# Supplementary material for: Tilted fiber Bragg gratings as a new sensing device for in situ and real time monitoring of surface-initiated polymerization
Source: Royal Society of Chemistry journal article supplement (doi:10.1039/c3py01421e), 2013-12-16
Supplement: c3py01421e.pdf [file c3py01421e.pdf]

## Tilted Fiber Bragg Gratings as new sensing device for in situ and real time monitoring of surface-initiated polymerization

Julie Pilate,<sup>a,b,†,\*</sup> Jean-Michel Renoirt,<sup>c,d,‡</sup> Christophe Caucheteur,<sup>c</sup> Jean Marie Raquez,<sup>b</sup> Franck Meyer,<sup>e</sup> Patrice Mégret,<sup>c</sup> Philippe Dubois<sup>b</sup> and Pascal Damman<sup>a</sup>

<sup>a</sup> InFluX Laboratory, Center of Innovation and Research in Materials and Polymers (CIRMAP), University of Mons UMONS, Place du Parc 23, 7000 Mons, (Belgium)

<sup>b</sup> Laboratory of Polymeric and Composite Materials, Center of Innovation and Research in Materials and Polymers (CIRMAP), University of Mons UMONS, Place du Parc 23, 7000 Mons, (Belgium)

<sup>c</sup> Electromagnetism & Telecom Department, University of Mons, UMONS, Boulevard Dolez, 31, 7000 Mons, (Belgium)

<sup>d</sup> Materials Science Department, University of Mons, UMONS, Place du parc 23, 7000 Mons (Belgium)

<sup>e</sup> Laboratory of Biopolymers and Supramolecular Nanomaterials, Faculty of Pharmacy, Université Libre de Bruxelles (ULB), Campus de la Plaine, Boulevard du Triomphe, 1050 Bruxelles (Belgium).

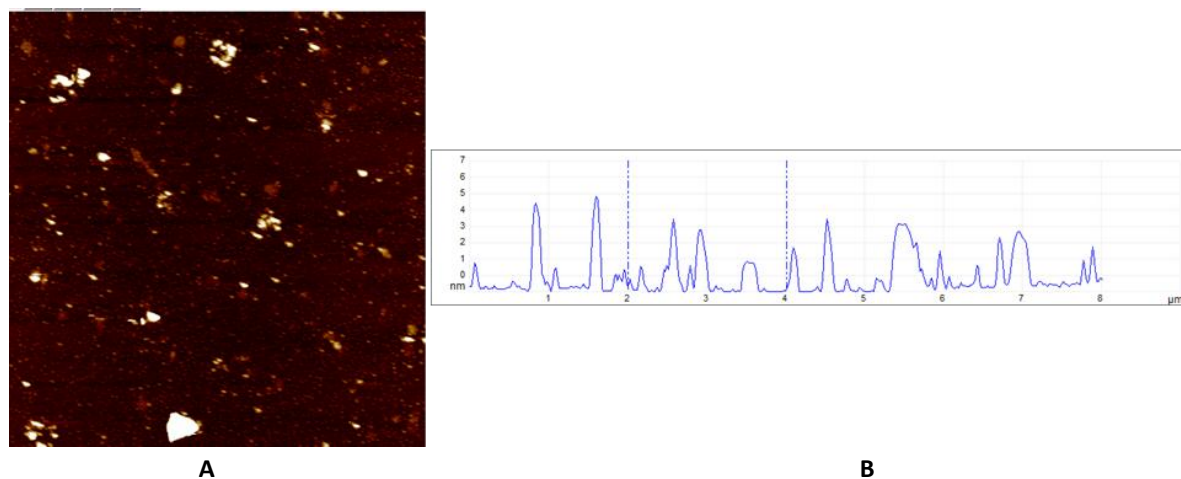

**Figure S1** TM-AFM ( $10 \times 10 \mu\text{m}^2$ ) of SAM prepared in dry  $\text{CH}_2\text{Cl}_2$  a) Height images and b) section of silicon substrate covered with a SAM built in dry  $\text{CH}_2\text{Cl}_2$  for 16 hours. Vertical scale bar is 3 nm.

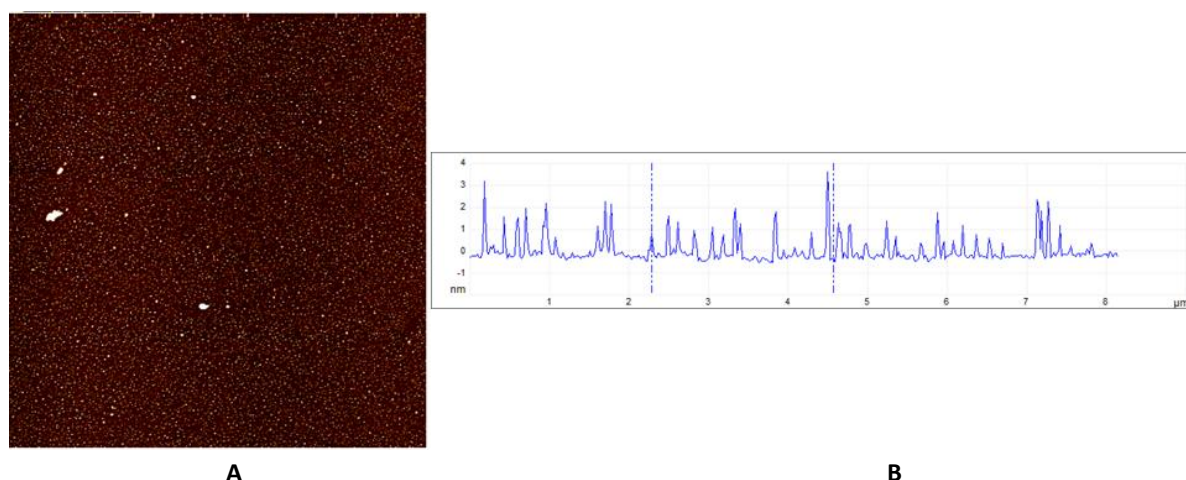

**Figure S2** TM-AFM ( $10 \times 10 \mu\text{m}^2$ ) of SAM prepared in dry toluene a) Height images and b) section of silicon substrate covered with a SAM built in dry toluene for 16 hours. Vertical scale bar is 4nm

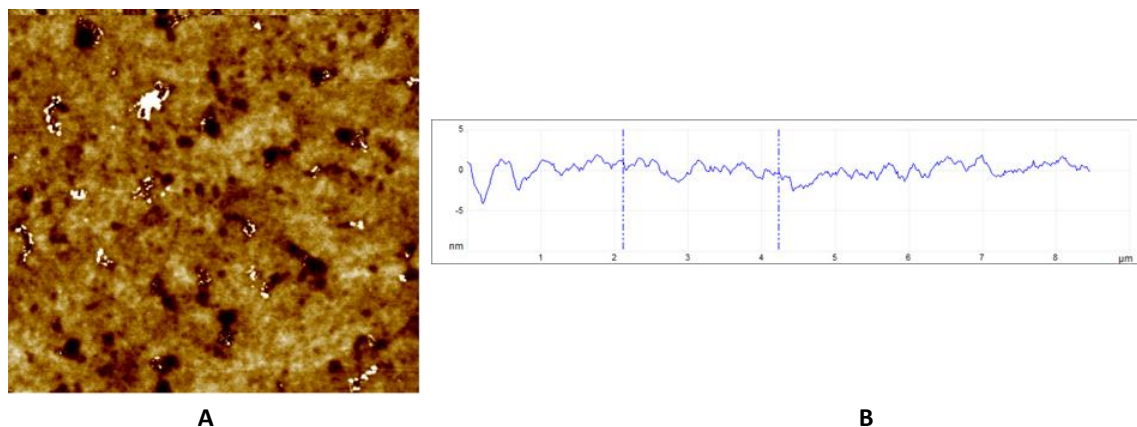

**Figure S3** TM-AFM ( $10 \times 10 \mu\text{m}^2$ ) of SAM prepared by vapor phase deposition a) height and b) section of silicon substrate covered with a SAM. Vertical scale bar is 4 nm

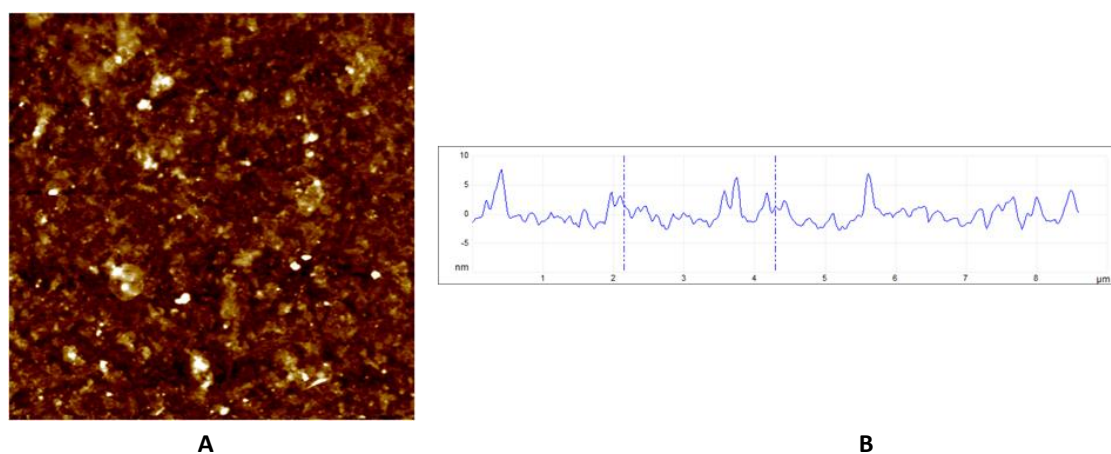

**Figure S4** a) TM-AFM height image ( $10 \times 10 \mu\text{m}^2$ ) of PDMAEMA brushes obtained by "grafting from" on silicon substrate. b) The height section is added. Vertical scale bar is 10nm.

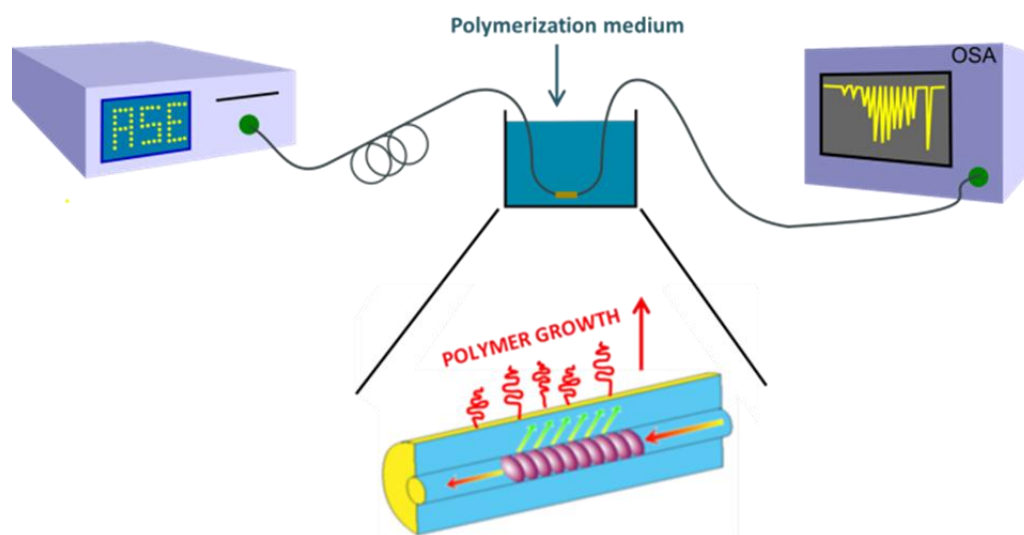

**Figure S5** Scheme of an optical fiber used for these tests
